# Supplementary material
Source: Springer Nature journal article supplement (https://www.springermedizin.de/resource/supplementary/12889_2010_3352_MOESM4_ESM.pdf/9488874)

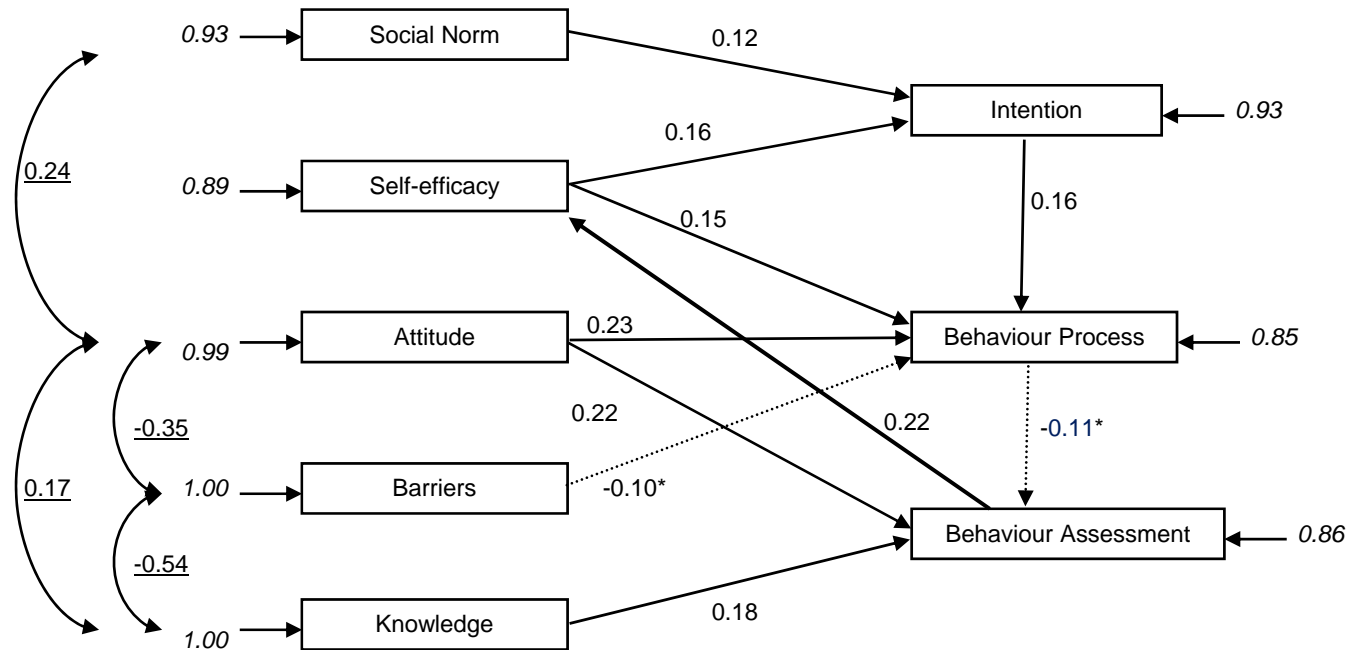

Chi-square=37.5, df=48, p=0.863, RSMEA=0.000, CFI=1.00, SRMR=0.041

Supplement: MOESM4 [file 9488874]
